# Supplementary material
Source: PubMed Central journal article supplement (PMC9734002)
Supplement: NIHMS1851913-supplement-Supporting_Information.pdf [file NIHMS1851913-supplement-Supporting_Information.pdf]

## Supplementary Information

### **Engineering targeted siRNA nanoparticles to silence plaque-destabilizing gene in atherosclerotic lesional macrophages**

Xiangang Huang<sup>1†</sup>, Chuang Liu<sup>1†</sup>, Na Kong<sup>1</sup>, Yufen Xiao<sup>1</sup>, Arif Yurdagul Jr.<sup>2</sup>, Ira Tabas<sup>3,4,5</sup>, Wei Tao<sup>1\*</sup>

<sup>1</sup>Center for Nanomedicine and Department of Anesthesiology, Brigham and Women's Hospital, Harvard Medical School, Boston, MA 02115, USA. <sup>2</sup>Department of Molecular and Cellular Physiology, LSU Health Shreveport, Shreveport, LA, 71130, USA. <sup>3</sup>Department of Medicine, Columbia University Irving Medical Center, New York, NY 10032, USA. <sup>4</sup>Department of Physiology and Cellular Biophysics, Columbia University Irving Medical Center, New York, NY 10032, USA. <sup>5</sup>Department of Pathology and Cell Biology, Columbia University Irving Medical Center, New York, NY 10032, USA.

<sup>†</sup>These authors contributed equally to this work.

\*Corresponding author. Email: wtao@bwh.harvard.edu

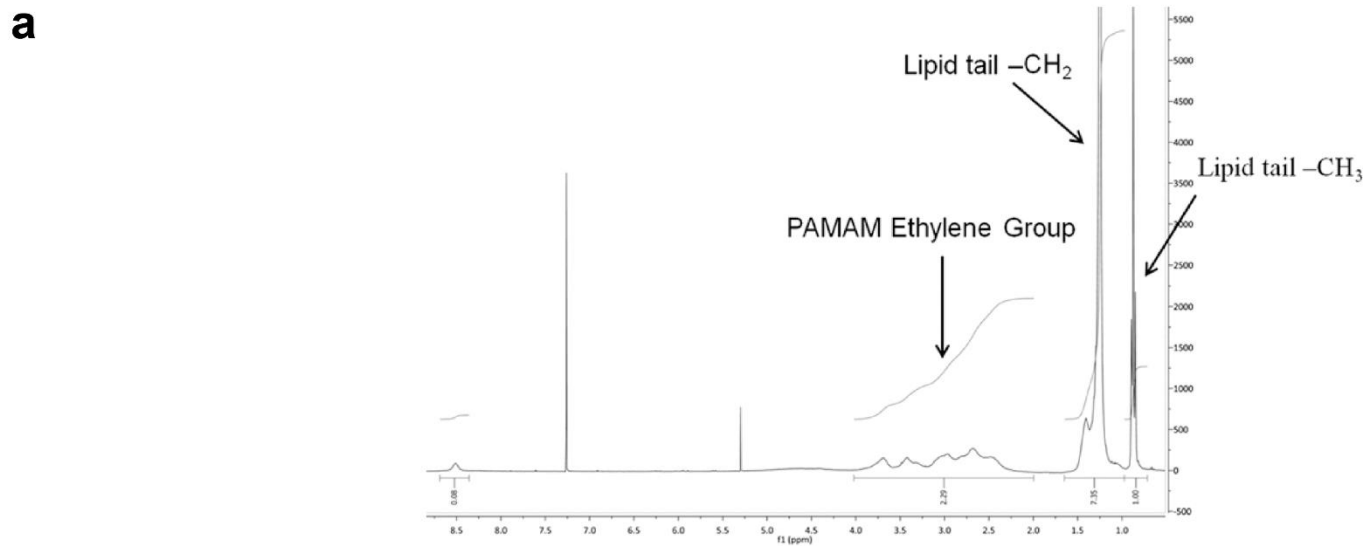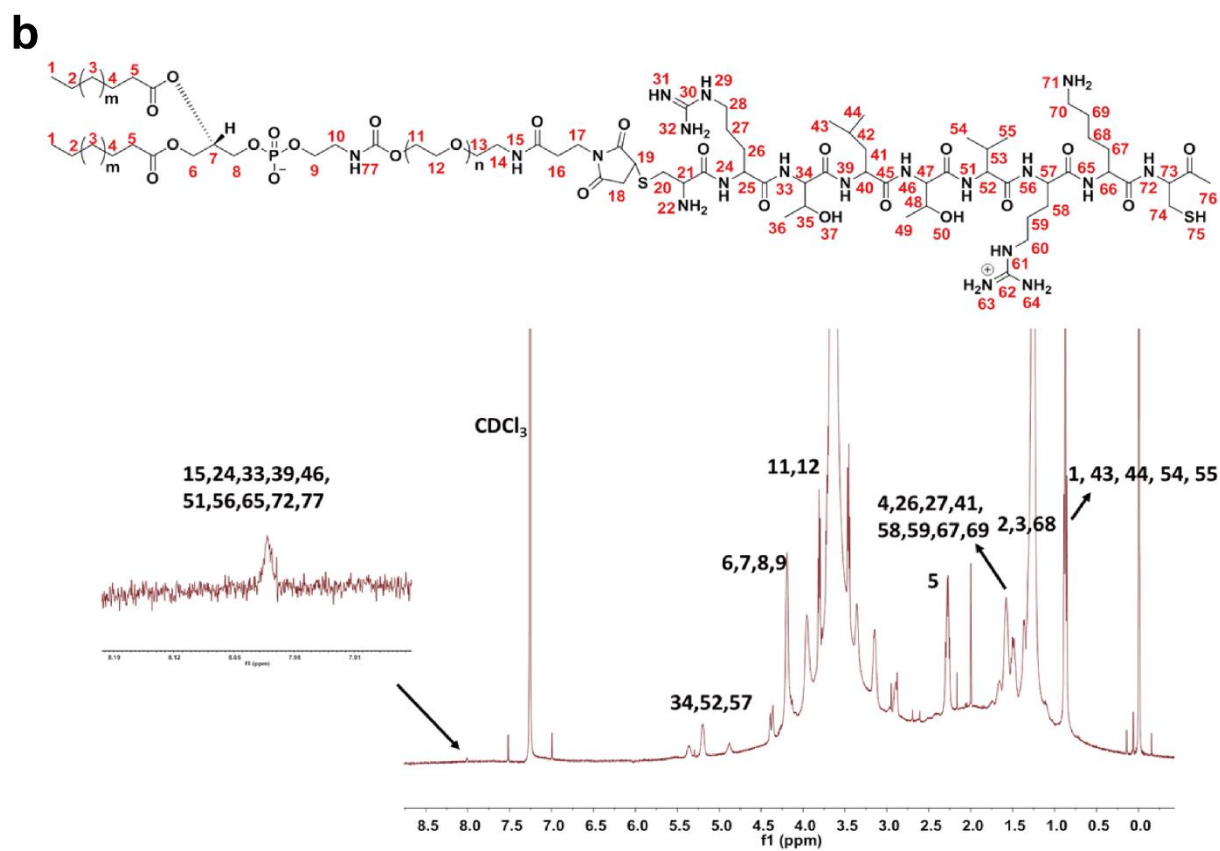

**Supplementary Figure 1.**  $^1\text{H}$  NMR analysis. **a**, G0-C14 ( $\text{CDCl}_3$ ). Adapted with permission from ref.<sup>1</sup>, National Academy of Sciences; **b**, DSPE-PEG-S2P ( $\text{CDCl}_3$ ). Adapted with permission from ref.<sup>2</sup>, American Association for the Advancement of Science.

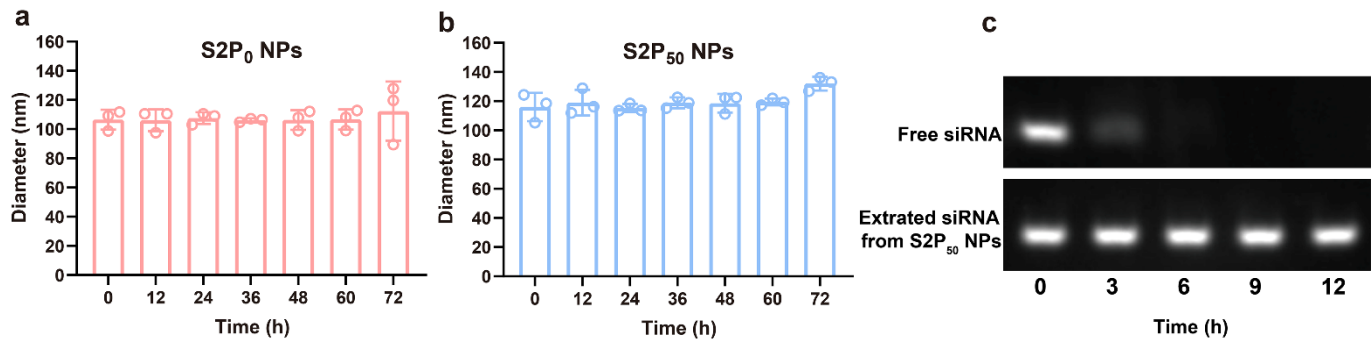

**Supplementary Figure 2.** Serum stability and protective effect of siRNA-loaded NPs for siRNA. **a-b**, Stability of S2P<sub>0</sub> and S2P<sub>50</sub> NPs in PBS solution containing 10% serum at 37 °C was determined by monitoring the particle size using DLS over 3 days. n = 3. Data are presented as mean ± SEM. **c**, Protective effect of siRNA-loaded NPs for siRNA in 10% (vol/vol) serum medium was characterized by assessing the extrated siRNA from S2P<sub>50</sub> NPs using agarose gel electrophoresis. **a-c**, Adapted with permission from ref.<sup>2</sup>, American Association for the Advancement of Science.

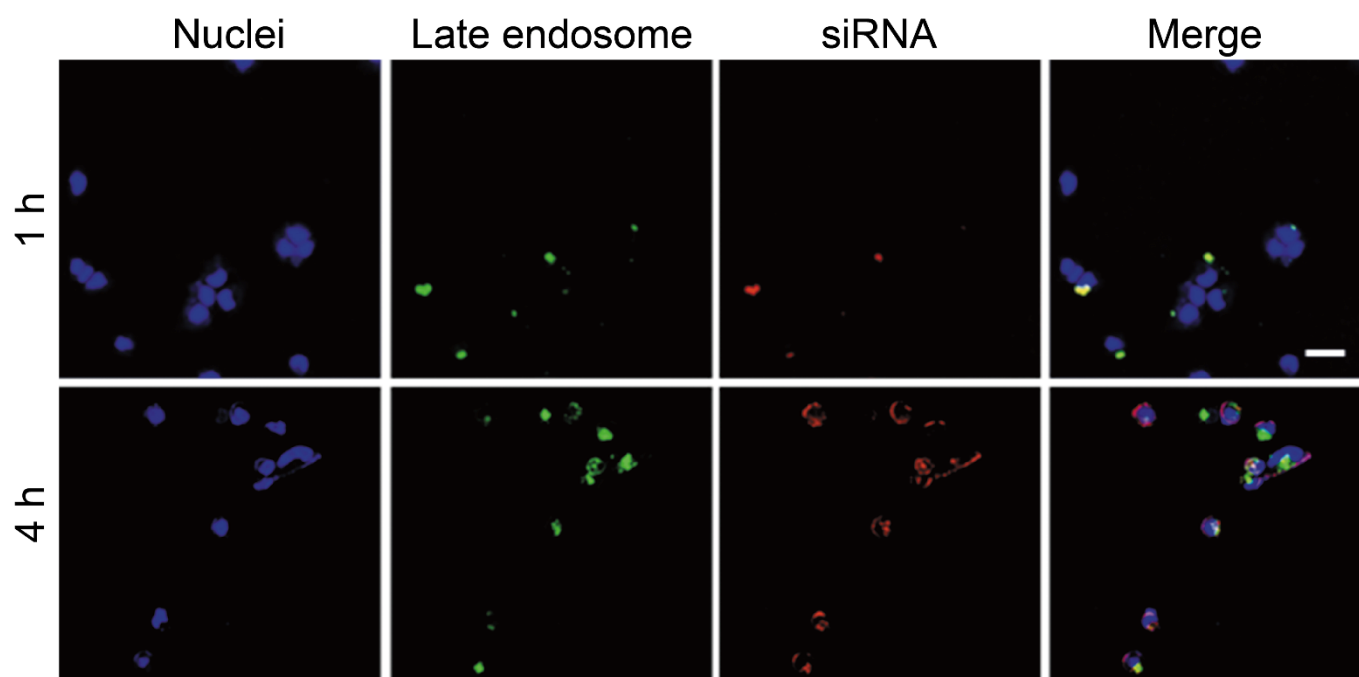

**Supplementary Figure 3.** Endosomal escape of siRNA-loaded NPs. Confocal microscopy images of HeLa-Luc cells treated with Dy647-siRNA-loaded S2P<sub>50</sub> NPs (red) for 1 and 4 h. The late endosomes were stained with LysoTracker Green (green) and the nuclei were stained with Hoechst 33342 (Blue). Adapted with permission from ref.<sup>2</sup>, American Association for the Advancement of Science.

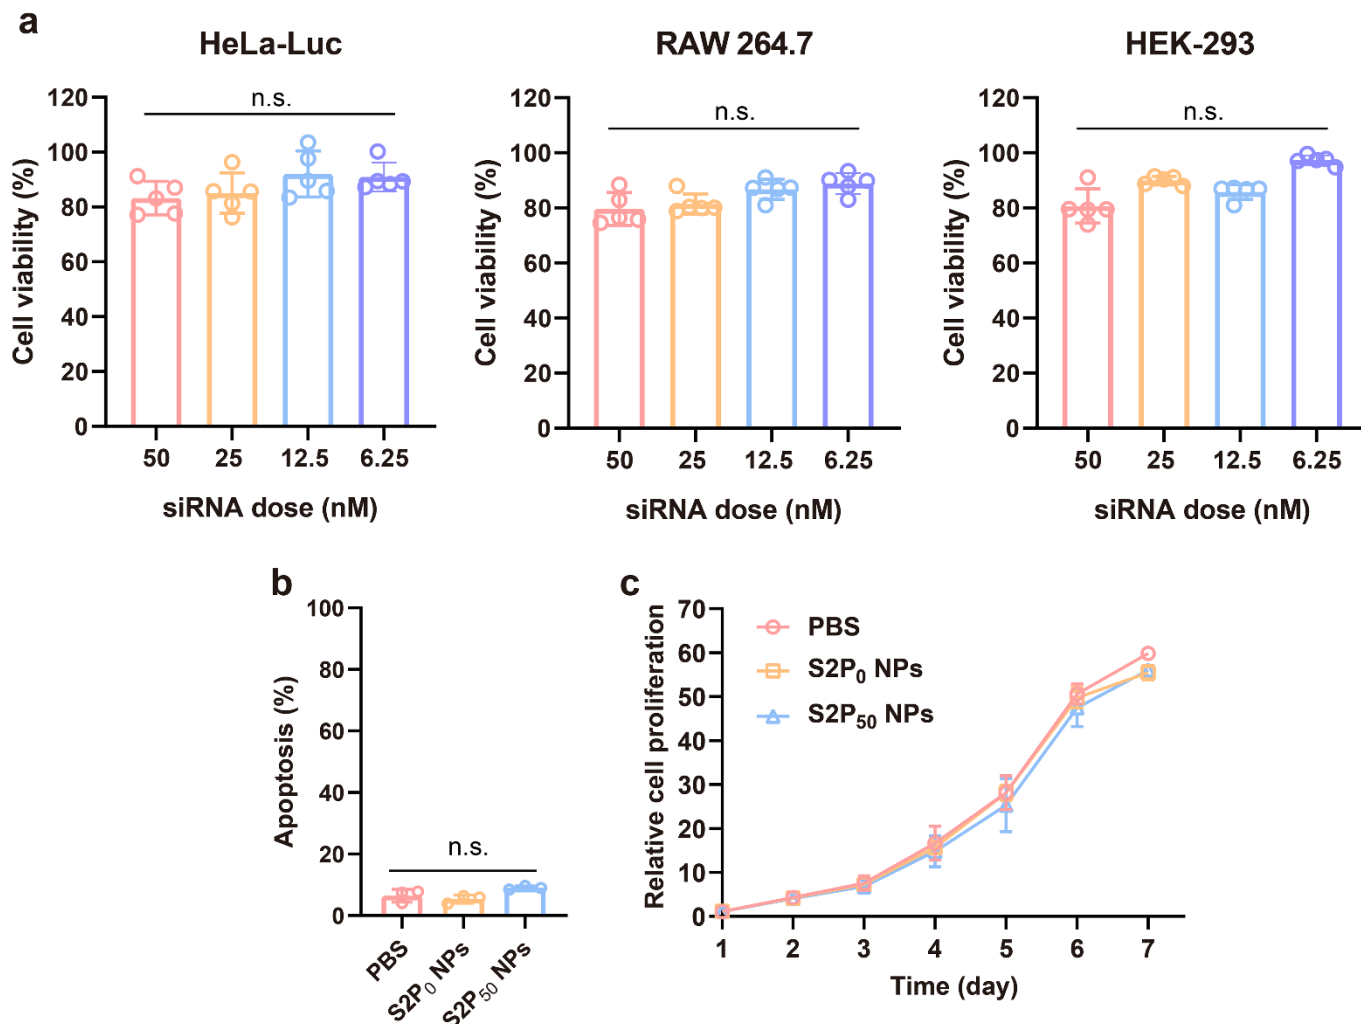

**Supplementary Figure 4.** In vitro biocompatibility of siRNA-loaded NPs. **a**, HeLa-luc, RAW 264.7 and HEK-293 cells were treated with S2P<sub>50</sub> NPs (siLuc 6.25-50 nM) for 24 h. After another 48 h incubation with fresh medium, the viability of the cells was assessed using alamarBlue reagent (n.s., not significant). n = 5. Data are presented as mean ± SEM. **b**, RAW 264.7 cells were treated with PBS, S2P<sub>0</sub> NPs and S2P<sub>50</sub> NPs (siLuc 50 nM) for 24 h. After another 48 h incubation with fresh medium, the apoptosis of the cells was assessed using Annexin V-FITC and propidium iodide (PI) (Annexin V-FITC Apoptosis Detection kit). n = 3. **c**, RAW 264.7 cells were treated with PBS, S2P<sub>0</sub> NPs and S2P<sub>50</sub> NPs (siLuc 50 nM) for 24 h. After another 48 h incubation with fresh medium, the proliferation of the cells was assessed using alamarBlue reagent. n = 3. **a-c**, Adapted with permission from ref.<sup>2</sup>, American Association for the Advancement of Science.

**Supplementary Table 1.** siRNA sequences used in this protocol

| <b>siRNA</b>       | <b>Strands</b>  | <b>Sequences</b>                          |
|--------------------|-----------------|-------------------------------------------|
| <b>siLuc</b>       | Sense           | 5'-CUU ACG CUG AGU ACU UCG AdTdT-3'       |
|                    | Antisense siLuc | 5'-UCG AAG UAC UCA GCG UAA GdTdT-3'       |
| <b>Dy647-siLuc</b> | Sense           | 5'-Dy647-CUU ACG CUG AGU ACU UCG AdTdT-3' |
|                    | Antisense       | 5'-UCG AAG UAC UCA GCG UAA GdTdT-3'       |
| <b>siCamK2g</b>    | Sense           | 5'-AAC GUG GUA CAU AAU GCU ACA-3'         |
|                    | Antisense       | 5'-UGU AGC AUU AUG UAC CAC GUU-3'         |

## Reference

- 1 Xu, X. *et al.* Enhancing tumor cell response to chemotherapy through nanoparticle-mediated codelivery of siRNA and cisplatin prodrug. *Proc. Natl. Acad. Sci.* **110**, 18638-18643 (2013).
- 2 Tao, W. *et al.* siRNA nanoparticles targeting CaMKII $\gamma$  in lesional macrophages improve atherosclerotic plaque stability in mice. *Sci. Transl. Med.* **12**, eaay1063 (2020).
